# Supplementary material for: AutoProstate: Towards Automated Reporting of Prostate MRI for Prostate Cancer Assessment Using Deep Learning
Source: MDPI journal article supplement (doi:10.3390/cancers13236138), 2021-12-06
Supplement: s1 [file s1]

# **AutoProstate: Towards Automated Reporting of Prostate MRI for Prostate Cancer Assessment using Deep Learning**

## Supplementary Sections

### **S1. Zone-U-Net Architecture**

Specifically, each Zone-U-Net features six encoding blocks and five decoding blocks. Each encoding block consists of two convolutional layers with stride one  $3 \times 3$  convolutions with zero padding, leaky rectified linear unit (LReLU) activation (neg. slope  $1e-2$ ) and instance normalization, followed by a stride two  $2 \times 2$  max pooling operation in the first five encoding blocks. Thirty-two feature maps are output by convolutional layers in the first encoding block, with feature maps doubling in each subsequent encoding block. Upsampling deconvolution operations are used in the decoding blocks, which receive semantic information from the last encoding block and higher resolution feature maps from encoder-to-decoder skip connections.

### **S2. CSPCa-U-Net Architecture**

CSPCa-U-Net features five encoding blocks and four decoding blocks. Each encoding block features two convolutional layers with stride one  $3 \times 3$  convolutions with zero padding, LReLU activation (neg. slope  $1e-2$ ) and instance normalization, followed by a stride two  $2 \times 2$  max pooling operation in the first four encoding blocks; 64 feature maps are output by convolutional layers in the first encoding block, with feature maps doubling in each subsequent encoding block. Upsampling deconvolution operations are used in the decoding blocks, which receive semantic information from the last encoder block and higher resolution feature maps from encoder-to-decoder skip connections.

## Supplementary Tables

**Supplementary Table S1.** PROSTATEx dataset characteristics.

|                                                                                         |                                                                                                                                                       |
|-----------------------------------------------------------------------------------------|-------------------------------------------------------------------------------------------------------------------------------------------------------|
| Center                                                                                  | Radboud Medical Center                                                                                                                                |
| Scan dates                                                                              | 2011 to 2012                                                                                                                                          |
| Scanner model(s)                                                                        | Siemens 3-T MAGNETOM Trio and Skyra                                                                                                                   |
| Reader experience                                                                       | >20 years                                                                                                                                             |
| Reporting standard                                                                      | PI-RADS v1                                                                                                                                            |
| Reference standard                                                                      | MR-guided targeted biopsy of PI-RADS $\geq 3$ lesions<br>PI-RADS = 2 lesions not biopsied (< 5% occurrence of CSPCa in PI-RADS = 2 lesions at center) |
| No. of included patients                                                                | 204                                                                                                                                                   |
| Patient population                                                                      | Clinically suspected                                                                                                                                  |
| Age (years)                                                                             | Not available                                                                                                                                         |
| PSA (ng/ml)                                                                             | Not available                                                                                                                                         |
| <b>Per-patient maximum Gleason score</b>                                                |                                                                                                                                                       |
| Not biopsied (max PI-RADS = 2, nCSPCa assumed) or only benign findings following biopsy | 105                                                                                                                                                   |
| Gleason score $\leq 6$                                                                  | 29                                                                                                                                                    |
| Gleason score 3+4                                                                       | 38                                                                                                                                                    |
| Gleason score 4+3                                                                       | 19                                                                                                                                                    |
| Gleason score 8                                                                         | 7                                                                                                                                                     |
| Gleason score 9-10                                                                      | 6                                                                                                                                                     |
| <b>MRI-detected lesions</b>                                                             |                                                                                                                                                       |
| No. of patients without MRI-detected lesions                                            | 4                                                                                                                                                     |
| No. of patients with MRI-detected lesions                                               | 200                                                                                                                                                   |
| Total annotated lesions                                                                 | 299                                                                                                                                                   |
| <b>Per-lesion Gleason score</b>                                                         |                                                                                                                                                       |
| Not biopsied (PI-RADS = 2, nCSPCa assumed) or benign following biopsy                   | 187                                                                                                                                                   |
| Gleason score $\leq 6$                                                                  | 36                                                                                                                                                    |
| Gleason score 3+4                                                                       | 41                                                                                                                                                    |
| Gleason score 4+3                                                                       | 20                                                                                                                                                    |
| Gleason score 8                                                                         | 8                                                                                                                                                     |
| Gleason score 9-10                                                                      | 7                                                                                                                                                     |
| <b>Per-lesion zone</b>                                                                  |                                                                                                                                                       |
| Peripheral zone                                                                         | 157                                                                                                                                                   |
| Central gland                                                                           | 122                                                                                                                                                   |
| Both zones                                                                              | 20                                                                                                                                                    |

CSPCa: clinically significant prostate cancer; MRI: magnetic resonance imaging; nCSPCa: not CSPCa; PI-RADS: Prostate Imaging-Reporting and Data System; PSA: prostate-specific antigen.

**Supplementary Table S2.** PICTURE dataset characteristics.

|                                              |                                              |
|----------------------------------------------|----------------------------------------------|
| Center                                       | University College London Hospital           |
| Scan dates                                   | 2012 to 2014                                 |
| Scanner model(s)                             | Philips Healthcare 3-T Achieva               |
| Reader experience                            | >10 years                                    |
| Reporting standard                           | Likert                                       |
| Reference standard                           | TTPM biopsy (5mm sampling) + targeted biopsy |
| No. of included patients                     | 247                                          |
| Patient population                           | Clinically suspected                         |
| Median age (years)                           | 62 (58 – 67)                                 |
| Median PSA (ng/ml)                           | 6.87 (5.09 – 9.60)                           |
| Median PSA density (ng/ml <sup>2</sup> )     | 0.18 (0.14 – 0.28)                           |
| <b>Per-patient Likert score</b>              |                                              |
| Likert 2                                     | 22                                           |
| Likert 3                                     | 82                                           |
| Likert 4                                     | 49                                           |
| Likert 5                                     | 94                                           |
| <b>Per-patient maximum Gleason score</b>     |                                              |
| No prostate cancer                           | 34                                           |
| Gleason score 3+3                            | 59                                           |
| Gleason score 3+4                            | 114                                          |
| Gleason score 4+3                            | 34                                           |
| Gleason score 8                              | 5                                            |
| Gleason score 9-10                           | 1                                            |
| <b>MRI-detected lesions</b>                  |                                              |
| No. of patients without MRI-detected lesions | 66                                           |
| No. of patients with MRI-detected lesions    | 181                                          |
| Total annotated lesions                      | 210                                          |
| <b>Per-lesion Likert score</b>               |                                              |
| Not identified prospectively                 | 33                                           |
| Likert 2                                     | 1                                            |
| Likert 3                                     | 29                                           |
| Likert 4                                     | 47                                           |
| Likert 5                                     | 100                                          |
| <b>Per-lesion Gleason score</b>              |                                              |
| Benign                                       | 9                                            |
| Gleason score 3+3                            | 54                                           |
| Gleason score 3+4                            | 113                                          |
| Gleason score 4+3                            | 29                                           |
| Gleason score 8                              | 4                                            |
| Gleason score 9-10                           | 1                                            |
| <b>Per-lesion zone</b>                       |                                              |
| Peripheral zone                              | 134                                          |
| Central gland                                | 57                                           |
| Both zones                                   | 19                                           |

MRI: magnetic resonance imaging; PSA: prostate-specific antigen; TTPM: transperineal template prostate-mapping biopsy.

**Supplementary Table S3.** Ten-fold cross-validation fold split of the PROSTATEx dataset. Lesion significance, size, and zone were used for fold stratification.

| Patient ID    | Fold |
|---------------|------|---------------|------|---------------|------|---------------|------|
| ProstateX0000 | 10   | ProstateX0051 | 4    | ProstateX0102 | 3    | ProstateX0153 | 8    |
| ProstateX0001 | 9    | ProstateX0052 | 1    | ProstateX0103 | 1    | ProstateX0154 | 6    |
| ProstateX0002 | 7    | ProstateX0053 | 2    | ProstateX0104 | 8    | ProstateX0155 | 10   |
| ProstateX0003 | 8    | ProstateX0054 | 5    | ProstateX0105 | 1    | ProstateX0156 | 5    |
| ProstateX0004 | 1    | ProstateX0055 | 8    | ProstateX0106 | 2    | ProstateX0157 | 10   |
| ProstateX0005 | 9    | ProstateX0056 | 2    | ProstateX0107 | 5    | ProstateX0158 | 2    |
| ProstateX0006 | 7    | ProstateX0057 | 4    | ProstateX0108 | 2    | ProstateX0159 | 8    |
| ProstateX0007 | 1    | ProstateX0058 | 6    | ProstateX0109 | 7    | ProstateX0160 | 9    |
| ProstateX0008 | 6    | ProstateX0059 | 2    | ProstateX0110 | 3    | ProstateX0161 | 3    |
| ProstateX0009 | 1    | ProstateX0060 | 4    | ProstateX0111 | 6    | ProstateX0162 | 6    |
| ProstateX0010 | 6    | ProstateX0061 | 6    | ProstateX0112 | 2    | ProstateX0163 | 9    |
| ProstateX0011 | 6    | ProstateX0062 | 7    | ProstateX0113 | 7    | ProstateX0164 | 2    |
| ProstateX0012 | 9    | ProstateX0063 | 10   | ProstateX0114 | 9    | ProstateX0165 | 10   |
| ProstateX0013 | 2    | ProstateX0064 | 4    | ProstateX0115 | 7    | ProstateX0166 | 1    |
| ProstateX0014 | 3    | ProstateX0065 | 5    | ProstateX0116 | 4    | ProstateX0167 | 3    |
| ProstateX0015 | 6    | ProstateX0066 | 1    | ProstateX0117 | 5    | ProstateX0168 | 2    |
| ProstateX0016 | 7    | ProstateX0067 | 6    | ProstateX0118 | 9    | ProstateX0169 | 4    |
| ProstateX0017 | 10   | ProstateX0068 | 3    | ProstateX0119 | 1    | ProstateX0170 | 3    |
| ProstateX0018 | 6    | ProstateX0069 | 10   | ProstateX0120 | 10   | ProstateX0171 | 2    |
| ProstateX0019 | 3    | ProstateX0070 | 2    | ProstateX0121 | 5    | ProstateX0172 | 1    |
| ProstateX0020 | 9    | ProstateX0071 | 4    | ProstateX0122 | 7    | ProstateX0173 | 3    |
| ProstateX0021 | 1    | ProstateX0072 | 9    | ProstateX0123 | 6    | ProstateX0174 | 9    |
| ProstateX0022 | 3    | ProstateX0073 | 9    | ProstateX0124 | 4    | ProstateX0175 | 8    |
| ProstateX0023 | 8    | ProstateX0074 | 3    | ProstateX0125 | 4    | ProstateX0176 | 7    |
| ProstateX0024 | 1    | ProstateX0075 | 1    | ProstateX0126 | 6    | ProstateX0177 | 4    |
| ProstateX0025 | 3    | ProstateX0076 | 5    | ProstateX0127 | 9    | ProstateX0178 | 4    |
| ProstateX0026 | 5    | ProstateX0077 | 8    | ProstateX0128 | 6    | ProstateX0179 | 2    |
| ProstateX0027 | 9    | ProstateX0078 | 5    | ProstateX0129 | 1    | ProstateX0180 | 5    |
| ProstateX0028 | 10   | ProstateX0079 | 7    | ProstateX0130 | 4    | ProstateX0181 | 2    |
| ProstateX0029 | 8    | ProstateX0080 | 4    | ProstateX0131 | 4    | ProstateX0182 | 3    |
| ProstateX0030 | 5    | ProstateX0081 | 5    | ProstateX0132 | 4    | ProstateX0183 | 2    |
| ProstateX0031 | 10   | ProstateX0082 | 3    | ProstateX0133 | 8    | ProstateX0184 | 7    |
| ProstateX0032 | 10   | ProstateX0083 | 7    | ProstateX0134 | 10   | ProstateX0185 | 8    |
| ProstateX0033 | 8    | ProstateX0084 | 2    | ProstateX0135 | 8    | ProstateX0186 | 4    |
| ProstateX0034 | 10   | ProstateX0085 | 6    | ProstateX0136 | 10   | ProstateX0187 | 5    |
| ProstateX0035 | 7    | ProstateX0086 | 1    | ProstateX0137 | 3    | ProstateX0188 | 8    |
| ProstateX0036 | 2    | ProstateX0087 | 7    | ProstateX0138 | 5    | ProstateX0189 | 1    |
| ProstateX0037 | 2    | ProstateX0088 | 7    | ProstateX0139 | 3    | ProstateX0190 | 5    |
| ProstateX0038 | 9    | ProstateX0089 | 5    | ProstateX0140 | 2    | ProstateX0191 | 4    |
| ProstateX0039 | 10   | ProstateX0090 | 6    | ProstateX0141 | 6    | ProstateX0192 | 8    |
| ProstateX0040 | 8    | ProstateX0091 | 8    | ProstateX0142 | 3    | ProstateX0193 | 4    |
| ProstateX0041 | 2    | ProstateX0092 | 10   | ProstateX0143 | 7    | ProstateX0194 | 10   |
| ProstateX0042 | 5    | ProstateX0093 | 3    | ProstateX0144 | 8    | ProstateX0195 | 7    |
| ProstateX0043 | 5    | ProstateX0094 | 8    | ProstateX0145 | 1    | ProstateX0196 | 3    |
| ProstateX0044 | 6    | ProstateX0095 | 9    | ProstateX0146 | 6    | ProstateX0197 | 10   |
| ProstateX0045 | 3    | ProstateX0096 | 1    | ProstateX0147 | 7    | ProstateX0198 | 1    |
| ProstateX0046 | 4    | ProstateX0097 | 8    | ProstateX0148 | 1    | ProstateX0199 | 9    |
| ProstateX0047 | 10   | ProstateX0098 | 4    | ProstateX0149 | 9    | ProstateX0200 | 9    |
| ProstateX0048 | 5    | ProstateX0099 | 4    | ProstateX0150 | 2    | ProstateX0201 | 7    |
| ProstateX0049 | 9    | ProstateX0100 | 9    | ProstateX0151 | 7    | ProstateX0202 | 3    |
| ProstateX0050 | 10   | ProstateX0101 | 5    | ProstateX0152 | 6    | ProstateX0203 | 1    |

**Supplementary Table S4.** Agreement and disagreement between radiologist Likert scoring and AutoProstate, on PICTURE dataset annotated lesions; grey shading indicates concordance, gold shading indicates superior performance by the experienced radiologist, and blue shading indicates superior performance by AutoProstate.

|             |                              | CSPCa Lesions (n = 147) |                 | nCSPCa Lesions (n = 63) |                 |
|-------------|------------------------------|-------------------------|-----------------|-------------------------|-----------------|
|             |                              | AutoProstate            |                 |                         |                 |
|             |                              | Predicted nCSPCa        | Predicted CSPCa | Predicted nCSPCa        | Predicted CSPCa |
| Radiologist | Not identified prospectively | 8% (12/147)             | 5% (8/147)      | 16% (10/63)             | 5% (3/63)       |
|             | Likert 2                     | 0% (0/147)              | 0% (0/147)      | 2% (1/63)               | 0% (0/63)       |
|             | Likert 3                     | 4% (6/147)              | 5% (7/147)      | 16% (10/63)             | 10% (6/63)      |
|             | Likert 4                     | 7% (10/ 147)            | 16% (23/147)    | 14% (9/63)              | 8% (5/63)       |
|             | Likert 5                     | 5% (8/ 147)             | 50% (73/147)    | 10% (6/63)              | 21% (13/63)     |

CSPCa: clinically significant prostate cancer; nCSPCa: not clinically significant prostate cancer.
